# Supplementary material for: Incidence and Risk Factors of Post-Transplant Diabetes Mellitus in Kidney Transplant Recipients: A Retrospective Study from a Tertiary Center in Saudi Arabia
Source: Research Square preprint supplement (doi:10.21203/rs.3.rs-6316096/v1), 2025-05-09
Supplement: Supplementary file 1 [file 61fda4786d491cb3a3c86a71.docx]

**Characteristics and Predictors of Post-Transplant Diabetes Mellitus: A Retrospective Analysis**

**Statistical Analysis**

Table of Contents

[Statistical analysis 3](#_Toc180435118)

[Overall patients’ analysis 3](#_Toc180435119)

[Baseline characteristics 3](#_Toc180435120)

[Transplantation information 4](#_Toc180435121)

[Laboratory biomarkers and viral status 5](#_Toc180435122)

[PTDM patients’ findings 6](#_Toc180435123)

[Determining age cutoff value 7](#_Toc180435124)

[ACR cutoff point 7](#_Toc180435125)

[Predictors of PTDM 8](#_Toc180435126)

[Figures 9](#_Toc180435127)

# Statistical analysis

The statistical analysis was performed using SPSS version 29. Continuous variables were presented as the mean ± SD or median and interquartile range (IQR), depending on the normality of their distribution. Categorical variables were presented as frequency and percentage. The t-test or Mann-Whitney U test was used to compare continuous variables between two independent groups, as appropriate. The Chi-squared test or Fisher's exact test was used to compare categorical variables, where applicable. The paired t-test was used to compare paired continuous variables. The Kaplan-Meier method was used to estimate survival free of PTDM. The ROC curve was used to determine cutoff values. Logistic regression analysis was employed for multivariate analysis to adjust for confounding and identify predictors of PTDM. All significant variables from the univariate analysis were included in the model. A two-sided p-value of less than 0.05 was considered statistically significant for all tests.

# Overall patients’ analysis

The first table demonstrates the baseline characteristics of the total cohort and each group. You can observe that the PTDM group is significantly older with higher weight, height and BMI. Additionally, the distribution of the etiology of ESRD differs significantly between the two groups, primarily due to the higher prevalence of hypertension among PTDM patients. This aligns with the expected metabolic changes and the interrelationship between hypertension and diabetes. No significant differences were detected in terms of gender.

## Baseline characteristics

|  | Total | No PTDM | PTDM | P value |
| --- | --- | --- | --- | --- |
| N | 228 | 174 (76.3%) | 54 (23.7%) |  |
| Age | 47.2±14.6 | 45.4±14.6 | 53.1±12.9 | <0.001 |
| Gender |  |  |  |  |
| Female | 82 (36%) | 67 (38.5%) | 15 (27.8%) | 0.203 |
| Male | 146 (64%) | 107 (61.5%) | 39 (72.2%) |
| Weight | 68.3±16.4 | 66.5±16.3 | 75.5±15.1 | 0.002 |
| Height | 162.9±9.5 | 161.9±9.7 | 165.6±8.6 | 0.026 |
| BMI | 25.5±5.3 | 25.2±5.4 | 27±4.7 | 0.023 |
| Etiology |  |  |  |  |
| Unknown | 167 (73.2%) | 133 (76.4%) | 34 (63%) | 0.006 |
| HTN | 24 (10.5%) | 11 (6.3%) | 13 (24.1%) |
| GN | 30 (13.2%) | 24 (13.8%) | 6 (11.1%) |
| APKD | 3 (1.3%) | 2 (1.1%) | 1 (1.9%) |
| Reflex | 4 (1.8%) | 4 (2.3%) | 0 (0%) |

## Transplantation information

The second table presents data related to the transplantation. No significant differences between the groups were found except for a marginally higher incidence of PTDM in patients with elevated tacrolimus levels. It is important to note that missing data, particularly regarding tacrolimus levels, is a key limitation of the study and should be mentioned as such. (NA means Cyclosporine patients, Can we use it to compare between FK and CSA groups)

FK unit

|  | Total | No PTDM | PTDM | P value |
| --- | --- | --- | --- | --- |
| Tx Type |  |  |  |  |
| Deceased | 26 (11.4%) | 21 (12.1%) | 5 (9.3%) | 0.259 |
| LR | 139 (61%) | 101 (58%) | 38 (70.4%) |
| LNR | 63 (27.6%) | 52 (29.9%) | 11 (20.4%) |
| Induction |  |  |  |  |
| Thymoglobulin | 69 (30.3%) | 53 (30.5%) | 16 (29.6%) | 0.923 |
| Basilixmab | 76 (33.3%) | 59 (33.9%) | 17 (31.5%) |
| Unknown | 83 (36.4%) | 62 (35.6%) | 21 (38.9%) |
| Maintenance |  |  |  |  |
| Tacrolimus + MMF+ prednisolone | 187 (82%) | 140 (80.5%) | 47 (87%) | 0.330 |
| Cyclosporine +MMF+ Prednisolone | 30 (13.2%) | 26 (14.9%) | 4 (7.4%) |
| Tacrolimus+Azathiuoprine+prednisolone | 11 (4.8%) | 8 (4.6%) | 3 (5.6%) |
| Tacrolimus | 198 (86.8%) | 148 (85.1%) | 50 (92.6%) | 0.174 |
| Cyclosporine | 30 (13.2%) | 26 (14.9%) | 4 (7.4%) |
| FK level |  |  |  |  |
| 5-7 | 86 (43.4%) | 71 (48%) | 15 (30%) | 0.075 |
| 7-10 | 94 (47.5%) | 64 (43.2%) | 30 (60%) |
| >10 | 18 (9.1%) | 13 (8.8%) | 5 (10%) |
| Graft Outcome |  |  |  |  |
| None | 206 (90.4%) | 159 (91.4%) | 47 (87%) | 0.874 |
| DGF | 4 (1.8%) | 3 (1.7%) | 1 (1.9%) |
| TCMR | 15 (6.6%) | 10 (5.7%) | 5 (9.3%) |
| ABMR | 3 (1.3%) | 2 (1.1%) | 1 (1.9%) |

## Laboratory biomarkers and viral status

The third table shows the laboratory findings. It reveals that the CMV prevalence is significantly higher in the PTDM group. Additionally, the presence of low magnesium levels is significantly associated with PTDM. These important findings should be supported by suggested mechanisms and previous literature evidence. Kidney function as measured by creatinine and GFR, was comparable between the two groups. However, kidney damage measured by urine protein and the albumin to creatinine ratio was significantly higher in the PTDM group.

HCV

|  | Total | No PTDM | PTDM | P value |
| --- | --- | --- | --- | --- |
| HCV | 10 (4.4%) | 8 (4.6%) | 2 (3.7%) | 1 |
| CMV | 9 (3.9%) | 4 (2.3%) | 5 (9.3%) | 0.036 |
| Low Mg | 93 (40.8%) | 52 (29.9%) | 41 (75.9%) | <0.001 |
| Last creatinine | 100 (81 to 125) | 100 (80 to 129) | 100 (81 to 114) | 0.540 |
| Last eGFR | 75 (57 to 94) | 75 (55 to 94) | 75 (64 to 91) | 0.505 |
| Urine PCr (mg/day) | 23 (11.5 to 71) | 21 (10 to 34) | 98.5 (29 to 160) | <0.001 |
| ACR (mg/mmol) | 4 (1 to 21) | 4 (1 to 10) | 18.5 (4 to 44) | <0.001 |

# PTDM patients’ findings

The 4th table presents the findings at the time of diabetes diagnosis. Nearly all patients had impaired fasting glucose and a quarter of them had severely uncontrolled diabetes. With HBA1C levels above 9, the mean survival free time for PTDM in the study sample was approximately 27 years. Patients who develop PTDM experienced an average weight gain of 7.1 kilograms. To maximize the clinical implications and applicability of the data, we conducted rock curve analysis to determine optimal cutoff points for age and ACR in predicting PTDM. You can see that an age greater than 36 years has an excellent sensitivity of 94.4% for predicting PTDM, which could be highly useful in practice in the sense that extra precautions should be considered in patients older than 36-years-old. Similarly, ACR more than 9 was found significant predictors. It is not mandatory to include these curves in your manuscript, but adding the written findings will be beneficial.

| Total | 54 |
| --- | --- |
| FBG |  |
| < 5.7 - 7 | 0 |
| 7 - 10 | 37 (68.5%) |
| > 10 | 17 (31.5%) |
| HBA1C |  |
| 6.5-9 | 40 (74.1%) |
| > 9 | 14 (25.9%) |
| Survival without PTDM (years) a | 27.7 (24.5 to 30.9) |
| Median time to devolve PTDM b | 2 (1 to 4.2) |
| Weight at DM diagnosis | 79.6±17 |
| BMI at DM diagnosis | 28.9±5.3 |
| Weight change | 7.1 (4.6 to 9.5) c |
| Medications |  |
| Metformin | 37 (68.5%) |
| Linagliptin (DPP-4) | 18 (33.3%) |
| Gliclazide (SUs) | 9 (16.7%) |
| Empagliflozin (SGLT2i) | 12 (22.2%) |
| Insulin | 26 (48.1%) |
| Semaglutide(GLP-1 agonists ) | 26 (48.1%) |

a estimated by Kaplan-Meir.

b median (interquartile range)

c mean change (95% confidence interval)

# Determining age cutoff value


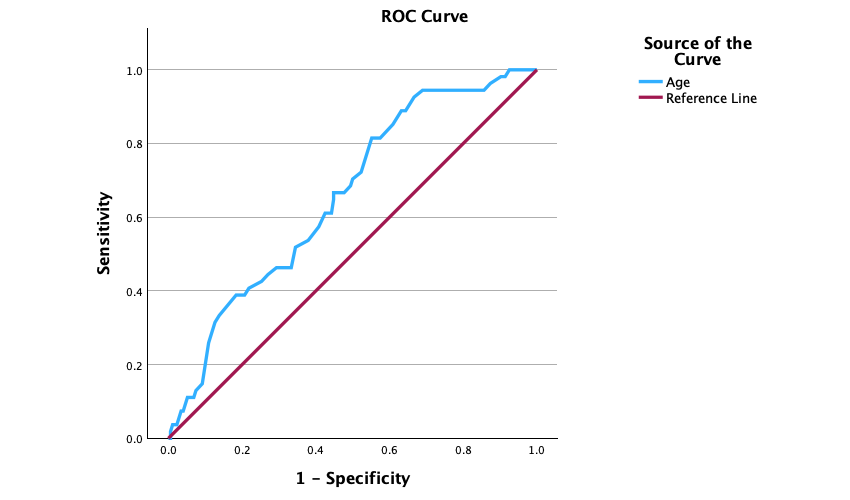


Area under the curve (AUC) = 0.658 (95% CI: 0.579 to 0.736), p-value <0.001. The 36-year-old cutoff point yielded sensitivity of 94.4% and specificity of 31%. While The 42-year-old cutoff point yielded sensitivity of 81.5% and specificity of 44.8%.

# ACR cutoff point


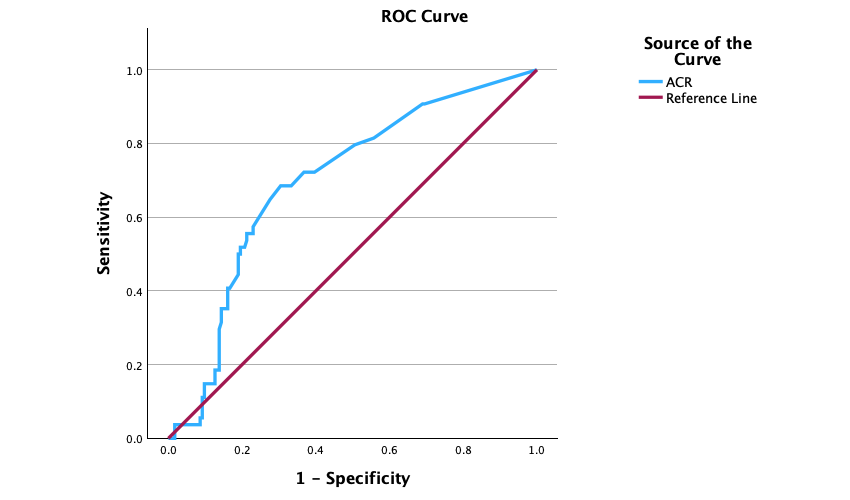


Area under the curve (AUC) = 0.697 (95% CI: 0.620 to 0.775), p-value <0.001. The 9 cutoff point yielded sensitivity of 68.5% and specificity of 69.5%.

# Predictors of PTDM

Finally, we performed univariate and multivariate analysis. The univariate analysis shows the association between each variable and the outcome. PTDM, for example, age has an odds ratio of 1.039, meaning that for each additional year of age, the risk of PTDM increases by 1.39. Patients older than 36 have an 8.4 fold higher risk of developing PTDM. The multivariate analysis on the right shows all the significant variables after adjustment for other factors. The adjusted odds ratios provide valuable information after accounting for confounding effects, you can see that the effects of weight and CMV become non significant after adjustment, while age, hypertension, low magnesium FK levels, and ACR, remain significant predictors of PTDM. Some journals request to include both univariate and multivariate analysis, while others accept multivariate analysis only.

|  | **Univariate** | | | **Multivariate** | | |
| --- | --- | --- | --- | --- | --- | --- |
|  | **OR** | **95% CI** | **P value** | **aOR** | **95% CI** | **P value** |
| **Age (years)** | 1.039 | 1.016 to 1.063 | <0.001 |  |  |  |
| **≥36 vs. <36** | 8.412 | 2.497 to 28.343 | <0.001 | 13.862 | 2.293 to 83.788 | 0.004 |
| **Males vs. Females** | 1.628 | 0.834 to 3.179 | 0.153 |  |  |  |
| **Bassline weight** | 1.036 | 1.011 to 1.062 | 0.005 | 1.022 | 0.982 to 1.063 | 0.284 |
| **Baseline height** | 1.044 | 1.005 to 1.085 | 0.028 |  |  |  |
| **Baseline BMI** | 1.073 | 0.995 to 1.157 | 0.066 |  |  |  |
| **Tx Type** |  |  |  |  |  |  |
| **Deceased** | Reference |  |  |  |  |  |
| **LR** | 1.58 | 0.556 to 4.49 | 0.39 |  |  |  |
| **LNR** | 0.888 | 0.275 to 2.869 | 0.843 |  |  |  |
| **HTN** | 4.698 | 1.963 to 11.248 | <0.001 | 7.925 | 1.828 to 34.352 | 0.006 |
| **Etiology** |  |  |  |  |  |  |
| **Unknown** | Reference |  |  |  |  |  |
| **HTN** | 4.623 | 1.904 to 11.223 | <0.001 |  |  |  |
| **GN** | 0.978 | 0.37 to 2.581 | 0.964 |  |  |  |
| **APKD** | 1.956 | 0.172 to 22.213 | 0.588 |  |  |  |
| **Reflex** | 0 |  | 0.999 |  |  |  |
| **Induction** |  |  |  |  |  |  |
| **ATG** | Reference |  |  |  |  |  |
| **SIMU** | 0.954 | 0.439 to 2.076 | 0.906 |  |  |  |
| **Unknown** | 1.122 | 0.532 to 2.367 | 0.763 |  |  |  |
| **Maintenance** |  |  |  |  |  |  |
| **FK+MMF+pr** | Reference |  |  |  |  |  |
| **CSA+MMF+Prd** | 0.458 | 0.152 to 1.381 | 0.166 |  |  |  |
| **FK+AZA+pr** | 1.117 | 0.285 to 4.385 | 0.874 |  |  |  |
| **FK level** |  |  |  |  |  |  |
| **5-7** | Reference |  |  | Reference |  |  |
| **7-10** | 2.219 | 1.095 to 4.494 | 0.027 | 5.013 | 1.314 to 19.128 | 0.018 |
| **>10** | 1.821 | 0.564 to 5.878 | 0.316 | 4.703 | 0.723 to 30.575 | 0.105 |
| **Graft Outcome** |  |  |  |  |  |  |
| **None** | Reference |  |  |  |  |  |
| **DGF** | 1.128 | 0.115 to 11.096 | 0.918 |  |  |  |
| **TCMR** | 1.691 | 0.551 to 5.193 | 0.358 |  |  |  |
| **ABMR** | 1.691 | 0.15 to 19.068 | 0.671 |  |  |  |
| **HCV** | 0.798 | 0.164 to 3.877 | 0.78 |  |  |  |
| **CMV** | 4.337 | 1.121 to 16.773 | 0.034 | 1.722 | 0.158 to 18.764 | 0.656 |
| **Low Mg** | 7.399 | 3.663 to 14.949 | <0.001 | 8.303 | 2.484 to 27.755 | <0.001 |
| **Last creatinine** | 0.997 | 0.993 to 1.002 | 0.268 |  |  |  |
| **Last eGFR** | 1.004 | 0.992 to 1.016 | 0.511 |  |  |  |
| **Urine PCr (mg/day)** | 1.002 | 1.001 to 1.004 | 0.009 |  |  |  |
| **ACR (mg/mmol)** | 1.001 | 0.998 to 1.004 | 0.478 |  |  |  |
| **≥9 vs. <9** | 4.969 | 2.571 to 9.602 | <0.001 | 14.786 | 4.036 to 54.172 | <0.001 |

aOR: adjusted odds ratio; CI: confidence interval.

# Figures

The first figure illustrates the association between age quartiles and the incidence of PTDM.

The incidence of PTDM by age quartile (p-value < 0.001)

The second figure shows the increased risk of PTDM with higher FK levels.

p-value = 0.075

The third figure displays a trend of increased PTDM incidents with higher BMI. Notably, this trend is broken in the category of obese individuals with a BMI of 30 to 35, which has a lower incidence. This deviation might explain why both BMI and weight were not significant predictors of PTDM.

p-value = 0.049

P = 0.877

The final figure shows the medications prescribed to treat PTDM patients. 2/3 of the patients received metformin, with half receiving insulin and GLP 1 agonist. Notably, the prescription of protective agents like SGLT2 inhibitors is low, with only 22% of patients receiving them.
