# Supplementary material for: Incidence and Risk Factors of Post-Transplant Diabetes Mellitus in Kidney Transplant Recipients: A Retrospective Study from a Tertiary Center in Saudi Arabia
Source: Research Square preprint supplement (doi:10.21203/rs.3.rs-6316096/v1), 2025-05-09
Supplement: Supplementary file 2 [file d91768c8a395951cc874da97.xlsx]

## Sheet: Sheet1
ID	First Intial	Last intial	PTDM	Age	Gender	weight	Height	BMI	Date of TXType		ESRD	induction	Maintnance	FK level	Graft Outcome	HCV	CMV	low Mg	FBG	HBA1C	Date of diagnosis	Weight	BMI	meds	meds	meds	meds	meds	meds	last cr	last egfr	urine PCr	ACR
			Yes=1		Male=1	unknown=0		unknown=0		Decas=1	Unknown=1	Atg=1	FK+MMF+pr=1	5-7=1	DGF=1	yes=1	yes=1	Yes=1	5.7-7=1	6.8-9=1		0=unknown	0=unknown	met	Lina	Glic	EMpa	insulin	glp1	mmol/l	CKD	mg/day	mg/mmo;
			No=2		Femal=2					LR=2	HTN=2	simu=2	CSA+MMF+Prd=2	7-10=2	TCMR=2	No=2	No=2	No=2	7-10=2	> 9=2				yes=1	yes=1	yes=1	yes=1	yes=1	yes=1		EPI
										LNR=3	GN=3	unknown=3	FK+AZA+pr=3	>10=3	ABMR=3				> 10=3					No=2	no=2	no=2	No=2	no=2	no=2
											APKD=4			NA	Non=0
											reflex=5
											DM=6
1005461544	M	A	1	66	1	62	161	23.5	2017	2	1	2	1	2	0	2	2	1	2	1	2017	62	24	1	1	2	1	1	2	96	75	100	3
1002910527	H	A	1	39	1	0	172	0	2008	2	1	3	1	1	0	2	2	2	2	1	2018	106	36	1	1	2	2	2	2	165	46	85	2
1005195217	A	H	1	73	1	0	0	0	2012	2	2	3	1	1	0	2	2	1	2	1	2013	0	0	1	1	2	2	2	2	59	99	84	4
1005593452	A	A	1	53	1	0	0	0	2008	3	1	3	1	1	0	2	2	1	2	1	2010	0	0	2	2	2	2	2	2	83	97	900	40
1001500964	A	A	1	42	1	0	161	0	2010	2	1	2	1	2	0	2	2	1	3	2	2020	70.5	27	1	2	1	2	1	2	119	67	175	23
2100154333	A	A	1	61	1	76	170	26	2018	1	1	1	1	2	0	2	1	1	2	1	2019	79	27	1	2	2	2	2	2	120	59	174	20
1002765996	A	A	1	53	1	50	174	16.5	2017	2	4	2	1	2	0	2	2	2	2	1	2019	57	19	2	2	2	2	1	2	89	89	200	40
1004312086	S	A	1	64	2	75.4	169	26	2017	3	2	2	1	1	2	2	2	1	2	1	2017	75	26	2	1	1	2	2	2	120	58	68	48
1000745768	M	A	1	39	1	0	167	0	2012	2	1	3	1	1	0	2	2	1	2	1	2017	70	25	1	1	2	2	2	2	112	74	110	44
1003067830	S	A	1	62	1	100	174	33	2016	3	1	3	1	2	0	2	2	1	2	1	2017	105	35	1	1	1	2	2	2	105	86	130	46
1000495273	F	A	1	43	2	0	149	0	2012	3	1	3	1	2	0	2	2	1	3	2	2014	74	33	1	2	2	2	1	1	56	97	190	125
2100119418	H	A	1	75	2	65	158	26	2020	2	1	1	3	2	0	2	2	1	2	2	2021	92	37	2	1	1	2	1	1	104	54	90	10
1002980090	M	A	1	71	1	75	165	27.5	2021	3	2	1	1	2	0	2	2	1	2	1	2022	75	28	1	2	2	1	2	2	73	99	100	10
1001669470	A	A	1	37	1	0	183	0	2015	2	1	2	3	1	0	2	2	1	3	2	2022	73	22	1	1	2	1	1	2	109	87	120	110
2100133374	T	A	1	40	1	71	169	25	2019	2	1	2	1	2	0	2	2	2	3	2	2021	79	28	2	2	2	1	1	2	84	114	355	480
1005470875	S	A	1	45	2	0	155	0	2012	2	3	3	3	1	0	2	2	1	2	1	2013	65	27	1	2	2	2	1	2	86	69	68	20	GDM
2100358725	H	A	1	63	1	53	160	20.7	2023	2	2	2	1	3	0	1	2	2	2	1	2024	48	19	2	1	2	2	2	2	93	76	68	30
1006881914	S	A	1	50	1	0	152	0	2009	1	1	3	1	1	0	2	2	1	3	2	2012	60	26	2	2	2	2	1	2	106	67	1000	152
1003576095	M	R	1	63	2	55.5	160	22	2018	2	2	1	1	1	0	2	1	2	2	1	2018	67	26	2	2	1	2	2	2	68	82	163	30
1007761248	F	M	1	65	2	0	0	0	1984	1	1	3	2	NA	0	2	2	2	2	2	2005	0	0	1	1	2	1	2	1	79	72	200	20
1001815164	S	A	1	76	1	85	177	27	2018	2	3	2	1	2	0	2	2	2	2	1	2019	89	28	1	1	2	1	2	2	65	112	68	90
2100086562	A	A	1	57	2	70	162	27	2017	1	2	2	1	1	0	2	2	1	2	1	2018	83	31	1	2	2	2	2	2	81	79	100	11
1001303765	S	A	1	56	1	95	165	34.5	2021	2	3	1	1	2	0	2	1	1	2	1	2023	100	37	1	1	1	2	2	1	125	69	45	9
1004153340	M	A	1	48	1	0	159	0	2015	3	1	3	1	2	0	2	2	1	2	1	2021	54	21	1	2	2	2	2	2	87	88	220	4
1004170807	M	A	1	70	2	0	0	0	2006	2	1	3	1	1	0	2	2	1	2	1	2023	0	0	2	2	2	2	1	2	144	34	128	31
1000531077	B	A	1	51	1	75	178	24	2017	1	2	1	1	2	0	2	2	1	2	1	2017	78.5	25	1	2	2	2	1	2	83	98	160	10
1004415467	H	A	1	36	2	53	156	22	2018	2	3	1	2	3	0	2	2	1	2	1	2021	67	28	1	2	2	2	2	2	60	116	36	4
1000816080	M	A	1	42	1	58	170	20	2019	2	1	1	1	2	0	2	2	1	3	1	2019	61	21	2	2	2	2	1	2	128	62	17	9
2100039572	N	A	1	42	1	74	160	29	2015	2	2	1	1	2	0	2	2	1	2	1	2019	78	31	1	1	2	2	2	2	81	107	20	2
1006516718	M	A	1	65	1	66	158	26.4	2021	2	1	2	1	2	0	2	2	2	3	2	2021	74	30	2	2	2	1	1	1	129	53	29	4
1005506231	S	A	1	67	1	70	162	27	2018	2	1	3	1	3	0	2	2	2	2	1	2022	80	31	1	2	2	2	2	2	67	99	400	17
1003881115	N	A	1	64	2	0	0	0	1988	3	1	3	2	NA	0	1	2	1	3	1	2011	0	0	1	1	1	1	1	2	64	91	100	14
1005943350	A	A	1	37	1	109	171	37	2018	3	3	1	1	2	3	2	1	1	3	1	2018	111	38	1	2	2	2	2	1	114	73	97	10
1001614823	M	A	1	61	1	85	172	29	2016	2	2	1	1	1	2	2	2	1	2	1	2016	95.5	32	2	2	2	2	1	1	109	67	11	2
2100103370	A	A	1	44	1	67	160	26	2017	2	1	1	1	1	2	2	1	1	2	1	2018	69	27	1	1	2	2	1	2	177	41	106	94
2100160794	A	A	1	42	1	77	170	27	2017	2	1	2	1	2	0	2	2	1	3	2	2020	98.5	34	1	2	1	2	1	2	114	71	161	54
1007599515	M	A	1	52	1	0	160	0	2012	2	1	3	1	2	0	2	2	1	3	1	2014	71	28	1	2	2	2	2	2	89	90	130	123
1001500964	A	A	1	73	1	0	0	0	2000	2	1	3	2	NA	0	2	2	2	2	2	2003	0	0	1	2	2	2	2	2	113	59	152	41
2100184191	S	A	1	64	1	96	172	32	2018	2	2	2	1	2	0	2	2	1	2	1	2018	96.5	32	1	2	2	2	1	2	107	67	16	1
1005758352	E	A	1	59	2	0	0	0	2007	3	1	3	1	2	0	2	2	1	2	1	2007	0	0	1	2	1	2	1	2	90	64	13	2
2100005217	A	A	1	42	1	90	180	28	2014	2	1	1	1	2	0	2	2	2	3	2	2015	105	32	1	2	2	2	1	2	110	74	16	62
1004254445	H	A	1	64	1	0	0	0	2006	3	1	3	1	2	2	2	2	1	2	1	2010	0	0	2	2	2	2	1	2	224	28	112	44
1002144069	N	A	1	48	2	0	0	0	2006	3	1	3	1	2	0	2	2	1	3	1	2006	0	0	1	1	2	1	1	2	72	89	10	7
2100043869	S	Q	1	61	1	85	180	26	2015	2	2	2	1	2	0	2	2	1	2	1	2017	91.5	28	1	2	2	2	2	2	92	82	13	13
2100226867	O	A	1	50	1	73.5	170	25.4	2019	2	2	2	1	3	0	2	2	1	2	1	2020	79	27	1	2	2	2	2	2	106	74	12	1
1008474775	T	A	1	40	1	95	180	29	2013	2	1	3	1	2	0	2	2	1	3	2	2016	118	36	1	2	2	1	2	1	106	78	15	1
1006644114	H	A	1	27	1	0	0	0	2012	2	1	3	1	2	1	2	2	1	2	1	2012	0	0	1	2	2	1	1	2	199	40	826	598
2100324861	A	A	1	47	1	100	170	35	2023	2	2	2	1	3	0	2	2	1	2	1	2024	105	36	2	2	2	2	2	1	90	91	7	1
1002508180	F	H	1	28	1	53	167	19	2019	2	3	1	1	1	0	2	2	1	2	1	2020	58	21	1	2	2	2	2	2	87	107	30	22
1001868304	B	A	1	53	1	75	168	27	2016	2	1	2	1	2	0	2	2	1	3	1	2019	80	28	1	1	2	1	2	2	68	107	14	2
1003267265	T	A	1	25	2	0	155	0	2011	2	1	3	1	3	0	2	2	1	2	1	2014	50	21	2	2	2	2	1	2	291	19	123	43
2100016815	A	A	1	63	1	81	161	31	2023	2	1	1	1	2	0	2	2	2	2	1	2024	82	32	1	1	2	2	2	2	105	69	53	6
2100219279	A	H	1	51	2	83	156	34	2022	2	1	1	1	2	0	2	2	1	3	2	2023	89	37	2	2	2	2	1	2	76	82	2	1
1007934241	N	A	1	58	2	69	149	31	2015	2	1	2	1	1	2	2	2	2	3	2	2015	80	36	2	2	2	2	1	2	255	18	74	50
1000689487	S	A	2	77	1	52	163	20	2014	3	6	3	1	1	2	2	2	2	1	NA	NA	NA	NA	NA	NA	NA	NA	NA	NA	506	10	932	328	FAILED GRAFT 12/2023
1000861334	J	A	2	38	1	72	174	24	2019	2	6	1	1	3	0	2	2	2	1	NA	NA	NA	NA	NA	NA	NA	NA	NA	NA	115	72	25	22
1001116324	A	A	2	35	2	56.5	159	22	2019	2	3	2	3	1	2	2	2	2	1	NA	NA	NA	NA	NA	NA	NA	NA	NA	NA	108	59	21	7
1001152600	O	A	2	34	2	70	160	27	2019	2	1	2	1	2	0	2	2	2	1	NA	NA	NA	NA	NA	NA	NA	NA	NA	NA	64	112	6	1
1001161825	N	A	2	37	2	51.5	159	20	2019	2	1	2	1	1	0	2	2	1	1	NA	NA	NA	NA	NA	NA	NA	NA	NA	NA	67	104	34	82
1001173457	H	A	2	60	2	64	149	28.8	2022	2	3	1	1	1	0	2	2	1	1	NA	NA	NA	NA	NA	NA	NA	NA	NA	NA	50	104	17	1
1001347697	R	A	2	34	2	80	157	32	2016	2	1	2	1	2	2	2	2	2	1	NA	NA	NA	NA	NA	NA	NA	NA	NA	NA	133	46	37	14
1001399342	S	A	2	35	1	96	178	30	2012	1	1	2	1	2	1	1	2	2	1	NA	NA	NA	NA	NA	NA	NA	NA	NA	NA	152	53	24	15
1001593894	M	A	2	56	1	86	174	28	2018	2	1	2	1	2	0	2	2	2	3	NA	NA	NA	NA	NA	NA	NA	NA	NA	NA	113	66	10	3
1001610995	A	A	2	58	1	76	170	26	2017	1	3	2	1	1	0	2	2	2	1	NA	NA	NA	NA	NA	NA	NA	NA	NA	NA	222	29	173	1
1001712965	A	A	2	66	1	89	177	28	2016	3	1	1	1	1	0	2	2	2	2	NA	NA	NA	NA	NA	NA	NA	NA	NA	NA	81	92	17	1
1001831930	J	A	2	53	1	80	163	30	2016	1	1	1	1	1	0	2	2	2	1	NA	NA	NA	NA	NA	NA	NA	NA	NA	NA	103	75	20	1
1001935061	M	A	2	52	1	74.3	167	26.6	2019	2	1	2	1	1	0	2	2	1	2	NA	NA	NA	NA	NA	NA	NA	NA	NA	NA	94	84	18	1
1002109179	S	A	2	54	2	0	0	0	1996	1	6	3	2	NA	0	2	2	2	1	NA	NA	NA	NA	NA	NA	NA	NA	NA	NA	103	56	108	16
1002469508	R	A	2	28	1	59	140	30	2016	3	1	3	1	1	0	2	1	2	1	NA	NA	NA	NA	NA	NA	NA	NA	NA	NA	147	57	172	51
1002572657	A	A	2	51	2	82	150	36	2019	2	1	1	1	1	0	2	2	2	2	NA	NA	NA	NA	NA	NA	NA	NA	NA	NA	91	66	34	3
1002577946	E	A	2	51	2	0	0	0	2006	3	1	3	2	NA	0	1	2	2	1	NA	NA	NA	NA	NA	NA	NA	NA	NA	NA	101	58	34	1
1002670121	F	A	2	55	1	64	170	22	2014	3	6	3	1	1	0	2	2	2	2	NA	NA	NA	NA	NA	NA	NA	NA	NA	NA	83	96	14	2
1002827002	T	A	2	45	1	0	0	0	2001	1	1	3	1	1	0	2	2	2	1	NA	NA	NA	NA	NA	NA	NA	NA	NA	NA	107	75	24	23
1002894986	S	A	2	73	1	0	0	0	2005	3	1	3	2	NA	0	2	2	2	2	NA	NA	NA	NA	NA	NA	NA	NA	NA	NA	125	52	284	85
1002900908	A	A	2	74	1	60	160	23	2013	3	1	3	1	1	0	2	2	2	1	NA	NA	NA	NA	NA	NA	NA	NA	NA	NA	60	98	14	3
1002904702	M	A	2	42	1	0	0	0	2010	3	1	3	1	2	0	2	2	2	1	NA	NA	NA	NA	NA	NA	NA	NA	NA	NA	135	58	11	4
1003061585	M	A	2	67	1	82	160	32	2015	2	1	3	1	1	0	2	2	1	1	NA	NA	NA	NA	NA	NA	NA	NA	NA	NA	89	82	9	5
1003067343	S	A	2	58	2	0	0	0	1996	2	1	3	1	2	0	2	2	2	2	NA	NA	NA	NA	NA	NA	NA	NA	NA	NA	49	105	44	16
1003068457	M	A	2	66	1	0	0	0	1998	3	1	3	2	NA	0	2	2	2	2	NA	NA	NA	NA	NA	NA	NA	NA	NA	NA	200	31	66	12
1003103148	A	A	2	43	2	0	0	0	2007	2	1	3	1	2	0	2	2	1	1	NA	NA	NA	NA	NA	NA	NA	NA	NA	NA	124	48	23	4
1003296694	E	A	2	50	1	0	0	0	2011	1	1	3	2	NA	0	2	2	2	1	NA	NA	NA	NA	NA	NA	NA	NA	NA	NA	107	73	22.6	10
1003308903	S	A	2	39	2	0	0	0	2006	1	1	3	1	1	0	2	2	1	2	NA	NA	NA	NA	NA	NA	NA	NA	NA	NA	216	25	81	22
1003362058	A	A	2	24	2	42	154	18	2016	3	1	2	1	1	0	2	2	1	1	NA	NA	NA	NA	NA	NA	NA	NA	NA	NA	68	111	10	5
1003488564	H	A	2	60	1	83	165	30	2012	2	1	3	1	1	0	2	2	2	2	NA	NA	NA	NA	NA	NA	NA	NA	NA	NA	102	73	12	3
1003492079	O	A	2	25	2	60	160	23	2016	3	3	3	1	2	0	2	2	2	1	NA	NA	NA	NA	NA	NA	NA	NA	NA	NA	103	67	17	1
1003545363	H	A	2	56	1	61	150	28	2018	3	3	2	1	1	1+2	2	2	1	1	NA	NA	NA	NA	NA	NA	NA	NA	NA	NA	153	46	34	2
1003754700	N	A	2	57	2	80	160	31	2017	3	6	3	1	1	0	2	2	2	2	NA	NA	NA	NA	NA	NA	NA	NA	NA	NA	88	66	17	5
1003790050	W	A	2	23	2	47	163	16	2019	3	3	2	1	2	0	2	2	2	1	NA	NA	NA	NA	NA	NA	NA	NA	NA	NA	98	72	9	1
1003843891	A	A	2	46	1	46	154	19.4	2022	2	1	1	1	3	0	2	2	1	1	NA	NA	NA	NA	NA	NA	NA	NA	NA	NA	93	88	7	1
1003917091	M	A	2	51	1	90	175	29	2014	2	3	1	1	2	0	2	2	2	1	NA	NA	NA	NA	NA	NA	NA	NA	NA	NA	111	69	7	34
1003953963	F	A	2	35	2	53	159	21	2018	2	3	2	1	1	0	2	2	2	1	NA	NA	NA	NA	NA	NA	NA	NA	NA	NA	99	66	9	9
1004310494	S	A	2	75	2	0	0	0	2006	3	1	3	2	NA	0	2	2	2	1	NA	NA	NA	NA	NA	NA	NA	NA	NA	NA	53	94	21	1
1004598676	A	A	2	40	1	100	167	36	2016	3	1	3	3	1	0	2	2	2	2	NA	NA	NA	NA	NA	NA	NA	NA	NA	NA	159	48	36	1
1004626709	T	A	2	54	1	0	0	0	2006	3	1	3	1	1	3	2	2	2	1	NA	NA	NA	NA	NA	NA	NA	NA	NA	NA	250	26	626	200
1004636294	H	A	2	68	1	0	0	0	2006	1	1	3	2	NA	0	2	2	2	2	NA	NA	NA	NA	NA	NA	NA	NA	NA	NA	167	38	302	73
1005214802	A	A	2	43	1	90	179	28	2012	1	6	3	1	1	0	2	2	2	2	NA	NA	NA	NA	NA	NA	NA	NA	NA	NA	89	95	19	2
1005399769	F	A	2	19	2	31	130	18	2021	2	1	2	1	2	0	2	2	2	1	NA	NA	NA	NA	NA	NA	NA	NA	NA	NA	85	87	5	1
1005505829	S	A	2	61	1	0	0	0	1988	2	1	3	2	NA	0	2	2	1	2	NA	NA	NA	NA	NA	NA	NA	NA	NA	NA	84	91	34	5
1005600802	A	A	2	40	2	0	0	0	2007	3	1	3	1	2	0	2	2	2	1	NA	NA	NA	NA	NA	NA	NA	NA	NA	NA	108	57	11	1
1005771637	A	A	2	73	2	0	0	0	2006	3	1	3	1	2	0	1	2	2	1	NA	NA	NA	NA	NA	NA	NA	NA	NA	NA	147	32	66	744
1006089112	A	A	2	75	1	100	166	36	2015	3	6	1	1	1	0	2	2	2	2	NA	NA	NA	NA	NA	NA	NA	NA	NA	NA	102	66	28	2
1006379695	D	A	2	56	2	81	160	32	2022	1	4	1	1	1	0	2	2	1	2	NA	NA	NA	NA	NA	NA	NA	NA	NA	NA	78	77	31	4
1006525982	H	A	2	68	2	85	160	33	2011	2	6	3	1	1	0	2	2	1	2	NA	NA	NA	NA	NA	NA	NA	NA	NA	NA	69	83	24	4
1006794703	M	A	2	42	2	0	0	0	2011	3	1	3	3	1	0	2	2	2	1	NA	NA	NA	NA	NA	NA	NA	NA	NA	NA	58	112	6	2
1006847204	E	A	2	58	1	77	170	27	2011	2	1	3	1	1	0	2	2	2	1	NA	NA	NA	NA	NA	NA	NA	NA	NA	NA	119	61	222	173
1006924037	S	A	2	33	1	54	160	21	2017	3	1	1	1	1	0	2	2	2	1	NA	NA	NA	NA	NA	NA	NA	NA	NA	NA	143	57	18	1
1007085747	H	A	2	61	1	0	0	0	2006	2	1	2	1	2	0	2	2	2	1	NA	NA	NA	NA	NA	NA	NA	NA	NA	NA	66	91	15	10
1007274820	M	A	2	61	1	0	0	0	2010	1	1	2	1	3	0	2	2	2	2	NA	NA	NA	NA	NA	NA	NA	NA	NA	NA	91	83	10	10
1007457706	M	A	2	55	1	86.5	170	30	2019	2	6	1	1	2	0	2	2	2	2	NA	NA	NA	NA	NA	NA	NA	NA	NA	NA	113	66	17	3
1007928045	F	A	2	39	2	44.5	158	18	2019	2	1	1	1	1	0	2	2	2	1	NA	NA	NA	NA	NA	NA	NA	NA	NA	NA	76	88	34	4
1008037523	M	A	2	64	1	61	166	22	2013	3	1	3	1	2	0	2	2	2	1	NA	NA	NA	NA	NA	NA	NA	NA	NA	NA	79	96	9	1
1008425793	M	A	2	53	1	104	166	37	2014	2	6	2	1	2	0	2	2	2	2	NA	NA	NA	NA	NA	NA	NA	NA	NA	NA	154	46	23	1
2100007931	Y	A	2	56	1	88	162	33.5	2022	2	1	1	1	2	0	2	2	2	1	NA	NA	NA	NA	NA	NA	NA	NA	NA	NA	126	58	229	72
2100022459	A	A	2	36	2	50	146	23	2016	2	5	2	1	1	0	2	2	1	1	NA	NA	NA	NA	NA	NA	NA	NA	NA	NA	83	81	34	4
2100022973	M	A	2	30	1	42	162	16	2015	2	1	1	1	2	0	2	2	2	1	NA	NA	NA	NA	NA	NA	NA	NA	NA	NA	81	115	23	1
2100040486	R	A	2	35	2	58	159	23	2016	2	1	1	1	2	2	2	2	1	1	NA	NA	NA	NA	NA	NA	NA	NA	NA	NA	83	81	7	1
2100049986	M	A	2	35	1	80	160	31	2015	2	1	2	1	1	0	2	2	2	2	NA	NA	NA	NA	NA	NA	NA	NA	NA	NA	85	106	23	1
2100055870	R	A	2	29	1	45	162	17	2017	2	3	2	1	1	0	2	2	1	2	NA	NA	NA	NA	NA	NA	NA	NA	NA	NA	141	60	23	3
2100094460	M	A	2	27	1	89	169	31	2018	3	1	1	2	NA	2+3	2	2	2	1	NA	NA	NA	NA	NA	NA	NA	NA	NA	NA	113	82	15	2
2100112033	S	A	2	21	1	48	170	17	2018	1	1	3	1	1	0	2	2	2	2	NA	NA	NA	NA	NA	NA	NA	NA	NA	NA	114	81	22	27
2100112939	S	A	2	22	1	55	166	20	2017	2	1	2	1	2	0	2	2	2	2	NA	NA	NA	NA	NA	NA	NA	NA	NA	NA	197	42	48	33
2100141602	A	A	2	35	2	46	160	18	2017	1	3	1	3	1	0	2	2	2	1	NA	NA	NA	NA	NA	NA	NA	NA	NA	NA	97	67	10	5
2100156696	K	A	2	54	1	70	160	27	2019	2	1	1	1	1	0	2	2	2	2	NA	NA	NA	NA	NA	NA	NA	NA	NA	NA	96	81	10	4
2100167520	S	A	2	58	2	86	157	34	2018	2	3	2	1	1	0	2	2	2	1	NA	NA	NA	NA	NA	NA	NA	NA	NA	NA	87	67	11	1
2100175014	A	A	2	33	2	53	159	21	2018	3	1	2	1	3	2	2	2	2	1	NA	NA	NA	NA	NA	NA	NA	NA	NA	NA	121	52	10	10
2100190135	M	A	2	50	1	80	171	27	2019	3	2	1	1	2	0	2	2	2	1	NA	NA	NA	NA	NA	NA	NA	NA	NA	NA	116	66	34	3
2100197243	F	A	2	27	1	90	165	33	2019	2	2	1	1	2	0	2	2	2	2	NA	NA	NA	NA	NA	NA	NA	NA	NA	NA	100	91	9	1
2100209910	F	A	2	39	1	67	176	22	2018	2	1	1	1	1	2	2	2	2	1	NA	NA	NA	NA	NA	NA	NA	NA	NA	NA	223	32	200	233
2100212121	K	H	2	46	1	73	175	24	2019	2	1	2	1	2	0	2	2	2	1	NA	NA	NA	NA	NA	NA	NA	NA	NA	NA	163	45	23	7
2100216170	S	A	2	34	2	77.5	156	32	2019	2	1	2	1	2	0	2	2	2	1	NA	NA	NA	NA	NA	NA	NA	NA	NA	NA	64	112	6	1
2100223409	A	A	2	26	1	58	169	20	2019	2	1	2	2	NA	0	2	2	2	1	NA	NA	NA	NA	NA	NA	NA	NA	NA	NA	128	68	23	8
2100276075	S	A	2	36	1	93	175	30	2021	2	1	1	1	2	0	2	2	2	1	NA	NA	NA	NA	NA	NA	NA	NA	NA	NA	92	95	9	1
2100317316	T	A	2	23	2	61	154	25.7	2022	2	1	1	1	1	2	2	2	1	1	NA	NA	NA	NA	NA	NA	NA	NA	NA	NA	107	65	10	1
2100319769	H	A	2	37	1	53	169	18.6	2022	2	1	1	1	2	0	2	2	2	1	NA	NA	NA	NA	NA	NA	NA	NA	NA	NA	92	95	10	1
2100327224	A	A	2	33	2	70	156	29	2016	3	1	3	3	1	0	2	2	2	1	NA	NA	NA	NA	NA	NA	NA	NA	NA	NA	69	103	33	98
1000017416	M	A	2	61	1	0	0	0	2006	3	1	3	2	NA	0	2	2	1	2	NA	NA	NA	NA	NA	NA	NA	NA	NA	NA	138	50	104	201
1000371425	A	A	2	61	2	0	0	0	2002	2	1	2	1	2	0	1	2	1	2	NA	NA	NA	NA	NA	NA	NA	NA	NA	NA	71	101	30	4
1000412385	B	A	2	43	1	71	167	25.5	2017	3	1	2	1	2	2	2	2	1	2	NA	NA	NA	NA	NA	NA	NA	NA	NA	NA	390	16	963	755
1000456788	S	A	2	44	2	52	160	20	2021	2	1	2	1	2	0	2	2	1	1	NA	NA	NA	NA	NA	NA	NA	NA	NA	NA	64	105	6	1
1000859536	M	A	2	38	1	67	170	23	2019	2	3	2	1	1	0	2	2	1	2	NA	NA	NA	NA	NA	NA	NA	NA	NA	NA	122	67	4	1
1000881068	I	K	2	38	1	58	167	20.8	2022	2	1	2	1	2	0	2	2	2	1	NA	NA	NA	NA	NA	NA	NA	NA	NA	NA	107	79	23	9
1001014198	A	A	2	62	1	0	0	0	2006	2	2	3	1	2	0	2	2	2	1	NA	NA	NA	NA	NA	NA	NA	NA	NA	NA	150	45	17	6
1001053436	S	A	2	66	2	0	0	0	2005	1	1	3	2	NA	0	2	2	1	1	NA	NA	NA	NA	NA	NA	NA	NA	NA	NA	109	48	79	52
1001303674	I	A	2	51	1	0	0	0	2003	3	1	3	2	NA	0	2	2	2	2	NA	NA	NA	NA	NA	NA	NA	NA	NA	NA	98	81	9	1
1001407061	S	A	2	57	1	0	0	0	2008	1	1	3	1	1	0	2	2	2	1	NA	NA	NA	NA	NA	NA	NA	NA	NA	NA	372	16	21	1
1001436482	M	A	2	60	1	80	170	28	2017	1	6	3	3	1	0	2	2	2	2	NA	NA	NA	NA	NA	NA	NA	NA	NA	NA	686	7	434	100
1001651197	R	A	2	32	1	49	154	21	2016	2	2	2	3	1	0	2	2	2	2	NA	NA	NA	NA	NA	NA	NA	NA	NA	NA	81	114	17	2
1001714995	S	A	2	82	1	0	0	0	2007	3	1	3	2	NA	0	2	2	1	2	NA	NA	NA	NA	NA	NA	NA	NA	NA	NA	113	56	30	8
1001784717	O	A	2	57	1	0	0	0	2003	3	3	3	1	1	0	2	2	2	1	NA	NA	NA	NA	NA	NA	NA	NA	NA	NA	82	96	39	1.3
1001794021	K	A	2	42	2	70	148	32	2021	2	3	1	3	2	0	2	2	1	1	NA	NA	NA	NA	NA	NA	NA	NA	NA	NA	112	54	30	4
1001830221	A	A	2	58	1	0	0	0	2003	3	1	3	2	NA	0	2	2	2	3	NA	NA	NA	NA	NA	NA	NA	NA	NA	NA	80	98	33	4
1000603405	S	A	2	71	1	0	0	0	2001	2	1	3	1	1	0	2	2	2	2	NA	NA	NA	NA	NA	NA	NA	NA	NA	NA	191	32	428	82
1001911229	G	A	2	35	1	70	159	28	2010	3	1	3	1	2	0	2	2	2	2	NA	NA	NA	NA	NA	NA	NA	NA	NA	NA	65	121	26	18
1002002044	A	A	2	31	2	36	147	17	2018	2	1	1	1	2	0	2	2	2	1	NA	NA	NA	NA	NA	NA	NA	NA	NA	NA	63	116	12	1
1002103636	T	A	2	29	1	61	160	24	2019	2	1	1	1	2	0	2	2	2	1	NA	NA	NA	NA	NA	NA	NA	NA	NA	NA	156	53	30	10
1002408829	M	S	2	52	1	70	150	31	2016	3	2	1	1	2	0	2	2	2	1	NA	NA	NA	NA	NA	NA	NA	NA	NA	NA	75	105	30	4
1000664944	H	A	2	72	2	0	0	0	2000	3	1	3	2	NA	0	2	2	2	2	NA	NA	NA	NA	NA	NA	NA	NA	NA	NA	92	57	22	1
1002523643	S	A	2	54	1	56	154	24	2014	2	1	3	1	2	0	2	2	2	1	NA	NA	NA	NA	NA	NA	NA	NA	NA	NA	97	80	10	10
1002595005	M	A	2	46	2	0	0	0	2005	3	1	3	2	NA	0	2	2	2	2	NA	NA	NA	NA	NA	NA	NA	NA	NA	NA	80	79	22	10
1002674172	Z	A	2	27	2	0	0	0	2005	3	1	3	2	NA	0	2	2	2	1	NA	NA	NA	NA	NA	NA	NA	NA	NA	NA	96	72	15	4
1002839650	A	A	2	26	1	48	174	16	2017	2	3	2	1	2	0	2	2	2	1	NA	NA	NA	NA	NA	NA	NA	NA	NA	NA	120	74	10	10
1002841284	R	A	2	25	2	69	147	31	2016	1	5	3	1	3	0	2	2	1	1	NA	NA	NA	NA	NA	NA	NA	NA	NA	NA	122	54	142	9
1002848685	S	A	2	35	2	0	0	0	2002	3	1	3	1	2	0	1	2	1	2	NA	NA	NA	NA	NA	NA	NA	NA	NA	NA	87	77	11	1
1002874004	W	S	2	28	2	30	145	14	2023	1	1	1	1	2	0	2	1	2	1	NA	NA	NA	NA	NA	NA	NA	NA	NA	NA	67	110	13	2
1002925186	M	M	2	50	1	60	157	24	2020	2	1	1	1	2	0	2	2	2	2	NA	NA	NA	NA	NA	NA	NA	NA	NA	NA	61	113	30	4
1002947669	A	A	2	65	2	80	160	31	2022	2	1	1	1	1	0	2	2	1	3	NA	NA	NA	NA	NA	NA	NA	NA	NA	NA	96	57	25	6
1002994224	S	A	2	74	1	83	172	28	2019	2	1	2	1	1	0	2	2	2	3	NA	NA	NA	NA	NA	NA	NA	NA	NA	NA	179	34	914	208
1003051032	S	A	2	65	1	90	175	29	2015	3	6	3	1	2	0	2	2	1	1	NA	NA	NA	NA	NA	NA	NA	NA	NA	NA	180	36	824	70
1003052220	A	A	2	68	1	100	167	35	2019	2	6	3	2	NA	0	2	2	2	2	NA	NA	NA	NA	NA	NA	NA	NA	NA	NA	136	49	10	11
1003067467	S	A	2	71	1	80	166	29	2014	2	6	2	1	2	0	2	2	2	2	NA	NA	NA	NA	NA	NA	NA	NA	NA	NA	78	92	11	1
1003073366	M	A	2	59	1	93	172	31	2018	2	2	2	1	2	0	2	2	2	1	NA	NA	NA	NA	NA	NA	NA	NA	NA	NA	78	99	16	1
1003170840	H	A	2	27	2	38.5	148	17.6	2020	2	1	2	1	1	0	2	2	1	1	NA	NA	NA	NA	NA	NA	NA	NA	NA	NA	87	81	60	2
1003286620	M	A	2	45	1	70	167	25	2010	1	1	3	1	1	0	2	2	1	1	NA	NA	NA	NA	NA	NA	NA	NA	NA	NA	152	49	23	2
1003341532	S	A	2	54	1	0	0	0	2001	3	1	3	2	NA	0	2	2	1	1	NA	NA	NA	NA	NA	NA	NA	NA	NA	NA	321	19	441	191
1003465547	A	A	2	52	1	55	157	22	2023	3	1	2	1	3	2+3	2	2	2	1	NA	NA	NA	NA	NA	NA	NA	NA	NA	NA	85	95	12	2
1003619358	H	A	2	70	2	60	150	27	2020	2	1	3	1	1	0	2	2	2	2	NA	NA	NA	NA	NA	NA	NA	NA	NA	NA	72	78	95	219
1003808308	A	A	2	34	1	46	150	20	2021	2	6	2	1	2	0	1	2	1	2	NA	NA	NA	NA	NA	NA	NA	NA	NA	NA	83	109	16	2
1003892351	G	A	2	54	2	0	0	0	2002	2	1	3	2	NA	0	2	2	2	2	NA	NA	NA	NA	NA	NA	NA	NA	NA	NA	387	11	1082	304
1004125769	M	M	2	52	1	64	160	25	2017	1	2	2	1	1	0	2	2	2	1	NA	NA	NA	NA	NA	NA	NA	NA	NA	NA	116	65	6	1
1004257513	A	I	2	59	1	0	0	0	2009	2	1	3	2	NA	0	2	2	2	1	NA	NA	NA	NA	NA	NA	NA	NA	NA	NA	80	98	11	4
1004457816	A	A	2	31	2	60	160	23	2021	2	3	2	1	1	0	2	2	2	1	NA	NA	NA	NA	NA	NA	NA	NA	NA	NA	75	94	9	1
1004593479	M	A	2	60	1	0	0	0	2005	3	2	3	2	NA	0	1	2	2	1	NA	NA	NA	NA	NA	NA	NA	NA	NA	NA	145	48	9	1
1004678700	A	Q	2	42	1	70	170	24	2014	2	1	2	1	1	0	2	2	2	1	NA	NA	NA	NA	NA	NA	NA	NA	NA	NA	81	107	34	1
1004764138	M	A	2	42	1	70	152	30	2017	3	1	1	1	1	0	1	2	1	1	NA	NA	NA	NA	NA	NA	NA	NA	NA	NA	114	71	30	9
1004783757	A	A	2	60	1	111	174	32.7	2013	3	4	3	1	2	0	2	2	1	1	NA	NA	NA	NA	NA	NA	NA	NA	NA	NA	84	92	14	1
1004800890	H	A	2	63	1	0	0	0	2002	3	1	3	2	NA	0	2	2	2	3	NA	NA	NA	NA	NA	NA	NA	NA	NA	NA	130	53	275	41
1004997837	A	A	2	46	1	0	0	0	2006	2	1	3	1	2	2	2	2	2	1	NA	NA	NA	NA	NA	NA	NA	NA	NA	NA	193	37	145	284
1005080815	S	A	2	52	1	0	0	0	2006	3	1	3	2	NA	0	2	2	2	2	NA	NA	NA	NA	NA	NA	NA	NA	NA	NA	966	5	460	250
1005251374	S	A	2	40	1	84	177	27	2015	2	3	2	1	1	0	2	2	2	1	NA	NA	NA	NA	NA	NA	NA	NA	NA	NA	157	49	122	681
1005252836	G	A	2	18	2	52	147	24	2018	2	3	3	1	2	0	2	2	1	1	NA	NA	NA	NA	NA	NA	NA	NA	NA	NA	55	132	10	1
1005704844	K	A	2	61	1	55	155	23	2015	2	1	2	1	1	0	2	2	1	1	NA	NA	NA	NA	NA	NA	NA	NA	NA	NA	62	105	22	2
1005958564	F	A	2	46	1	50	166	18	2016	3	1	2	1	2	0	2	2	1	1	NA	NA	NA	NA	NA	NA	NA	NA	NA	NA	100	81	46	8
1007353541	A	A	2	49	1	80	175	26	2014	1	1	2	1	1	1	2	2	2	2	NA	NA	NA	NA	NA	NA	NA	NA	NA	NA	116	67	10	12
1007354341	A	A	2	40	1	65	176	21	2019	2	1	1	1	2	0	2	2	2	1	NA	NA	NA	NA	NA	NA	NA	NA	NA	NA	131	61	29	12
1007911496	S	A	2	39	1	69	150	31	2013	3	1	3	2	NA	0	2	2	2	2	NA	NA	NA	NA	NA	NA	NA	NA	NA	NA	122	67	18	2
1008581223	M	A	2	41	1	85	170	29	2014	2	1	2	1	2	0	2	2	2	2	NA	NA	NA	NA	NA	NA	NA	NA	NA	NA	125	64	8	2
1008624684	M	A	2	52	2	65	156	26	2014	3	1	3	3	1	0	2	2	1	1	NA	NA	NA	NA	NA	NA	NA	NA	NA	NA	72	87	9	1
2100008006	H	A	2	54	2	58	162	22	2022	2	1	1	1	3	0	2	2	1	2	NA	NA	NA	NA	NA	NA	NA	NA	NA	NA	73	84	17	1
2100013842	A	A	2	31	1	100	170	34	2018	2	6	2	1	1	0	2	2	1	3	NA	NA	NA	NA	NA	NA	NA	NA	NA	NA	122	70	34	8
2100042490	M	A	2	37	1	94.7	162	36.1	2020	2	1	1	1	2	0	2	2	2	1	NA	NA	NA	NA	NA	NA	NA	NA	NA	NA	114	73	15	2
2100061089	M	A	2	61	2	70	153	30	2018	2	2	2	1	1	0	2	2	2	1	NA	NA	NA	NA	NA	NA	NA	NA	NA	NA	101	55	9	1
2100061657	A	A	2	30	1	79.5	166	29	2019	2	1	2	1	1	0	2	2	1	1	NA	NA	NA	NA	NA	NA	NA	NA	NA	NA	104	85	40	23
2100073259	N	A	2	31	1	85	170	29	2017	2	1	1	1	1	2+3	2	2	2	1	NA	NA	NA	NA	NA	NA	NA	NA	NA	NA	1250	4	60	33
2100083251	T	A	2	40	2	43	162	16	2019	2	3	2	1	3	0	2	2	1	1	NA	NA	NA	NA	NA	NA	NA	NA	NA	NA	72	93	10	8
2100088304	W	A	2	49	2	68	150	30.7	2016	3	1	3	1	1	0	2	2	2	1	NA	NA	NA	NA	NA	NA	NA	NA	NA	NA	71	90	40	4
2100092190	M	A	2	68	2	63	147	29	2015	2	1	3	1	1	0	2	2	2	1	NA	NA	NA	NA	NA	NA	NA	NA	NA	NA	62	94	17	1
2100110835	F	A	2	30	2	32	136	17	2019	2	1	3	1	1	0	2	2	1	1	NA	NA	NA	NA	NA	NA	NA	NA	NA	NA	54	123	30	4
2100111679	S	A	2	35	1	80	165	29	2016	2	1	1	1	1	0	2	2	1	1	NA	NA	NA	NA	NA	NA	NA	NA	NA	NA	104	83	11	1
2100117692	S	A	2	61	1	98	180	30	2018	3	1	2	1	1	0	2	2	2	1	NA	NA	NA	NA	NA	NA	NA	NA	NA	NA	96	78	11	2
2100152704	K	A	2	58	1	75	173	25	2017	2	1	2	1	1	0	2	2	2	2	NA	NA	NA	NA	NA	NA	NA	NA	NA	NA	79	99	20	2
2100160893	A	A	2	45	1	89	168	31.5	2018	3	3	1	1	1	0	2	2	2	2	NA	NA	NA	NA	NA	NA	NA	NA	NA	NA	83	102	7	3
2100169049	G	A	2	37	2	60	150	26.7	2018	2	1	1	1	1	0	2	2	1	2	NA	NA	NA	NA	NA	NA	NA	NA	NA	NA	88	75	135	137
2100178746	A	A	2	32	2	46	156	19	2018	2	1	2	1	2	0	2	2	1	1	NA	NA	NA	NA	NA	NA	NA	NA	NA	NA	61	118	20	1
2100180179	S	A	2	33	2	60	150	27	2018	2	1	1	1	1	0	2	2	2	1	NA	NA	NA	NA	NA	NA	NA	NA	NA	NA	80	86	6	1
2100189039	K	A	2	48	1	67	153	28.6	2018	2	1	1	1	2	0	2	2	1	1	NA	NA	NA	NA	NA	NA	NA	NA	NA	NA	99	81	9.7	1
2100190131	S	A	2	43	1	80	170	28	2019	1	1	2	1	2	2	2	2	2	1	NA	NA	NA	NA	NA	NA	NA	NA	NA	NA	140	55	12	2
2100206962	M	A	2	41	1	70	180	22	2018	2	2	2	1	2	3	2	1	2	1	NA	NA	NA	NA	NA	NA	NA	NA	NA	NA	1243	4	406	250
2100217656	S	A	2	19	2	27	146	13	2019	2	1	2	1	1	0	2	2	1	1	NA	NA	NA	NA	NA	NA	NA	NA	NA	NA	66	118	7	1
2100221909	Y	A	2	41	1	82	170	28	2019	2	1	2	1	2	0	2	2	1	1	NA	NA	NA	NA	NA	NA	NA	NA	NA	NA	124	65	4	2
2100231917	A	A	2	27	2	80	156	33	2019	2	5	1	1	2	0	2	2	1	2	NA	NA	NA	NA	NA	NA	NA	NA	NA	NA	102	67	11	2
2100233017	K	A	2	57	1	86.5	164	32	2019	2	1	2	1	1	0	2	2	2	2	NA	NA	NA	NA	NA	NA	NA	NA	NA	NA	69	104	22	4
2100245016	Z	A	2	23	1	60	163	22.6	2019	2	1	2	1	1	0	2	2	2	2	NA	NA	NA	NA	NA	NA	NA	NA	NA	NA	95	99	7	1
2100260413	K	A	2	30	1	90	172	30	2019	2	3	3	1	2	0	2	2	1	1	NA	NA	NA	NA	NA	NA	NA	NA	NA	NA	96	94	18	9
2100264030	M	A	2	68	1	67	170	23	2021	2	1	1	1	2	0	2	2	1	3	NA	NA	NA	NA	NA	NA	NA	NA	NA	NA	79	93	16	4
2100292915	A	A	2	28	1	67	169	23	2013	2	1	3	1	2	2+3	2	2	2	1	NA	NA	NA	NA	NA	NA	NA	NA	NA	NA	941	4	416	201
2100339985	K	A	2	24	1	55.5	182	16.8	2022	2	5	1	1	1	0	2	2	1	1	NA	NA	NA	NA	NA	NA	NA	NA	NA	NA	97	96	23	1
1001133105	S	A	2	36	2	0	0	0	2002	3	1	3	2	NA	0	2	2	2	1	NA	NA	NA	NA	NA	NA	NA	NA	NA	NA	175	33	25	8
1002009585	N	A	2	49	2	57	159	22.5	2023	2	1	1	1	3	0	1	2	2	1	NA	NA	NA	NA	NA	NA	NA	NA	NA	NA	117	49	20	3
1002083085	A	M	2	68	2	60	146	28	2023	2	6	1	1	2	0	2	2	2	1	NA	NA	NA	NA	NA	NA	NA	NA	NA	NA	85	64	23	2
1002439063	H	A	2	59	1	63	166	23	2023	1	6	1	1	1	1	2	2	2	1	NA	NA	NA	NA	NA	NA	NA	NA	NA	NA	95	80	23	1
1003062039	R	A	2	62	2	72	159	28.5	2023	2	1	1	1	3	0	2	2	2	2	NA	NA	NA	NA	NA	NA	NA	NA	NA	NA	75	78	22	1
1003247671	F	A	2	51	1	74	171	25	2023	2	2	1	1	2	0	2	2	2	1	NA	NA	NA	NA	NA	NA	NA	NA	NA	NA	101	78	30	4
1003920558	M	A	2	66	2	67	150	30	2023	2	6	1	1	2	0	2	2	2	2	NA	NA	NA	NA	NA	NA	NA	NA	NA	NA	61	96	30	7
1004459747	S	A	2	22	1	65	170	22.5	2023	1	1	1	1	2	2	2	2	1	2	NA	NA	NA	NA	NA	NA	NA	NA	NA	NA	153	57	12	2
1004712236	K	A	2	20	1	54	179	16.9	2022	2	1	2	1	2	0	2	2	2	1	NA	NA	NA	NA	NA	NA	NA	NA	NA	NA	135	66	27	7
1005406978	M	A	2	40	1	52	167	19	2023	2	3	1	1	2	0	2	2	2	2	NA	NA	NA	NA	NA	NA	NA	NA	NA	NA	76	112	27	1
1006919367	B	A	2	55	2	69	160	27	2022	1	1	1	1	3	0	2	1	2	1	NA	NA	NA	NA	NA	NA	NA	NA	NA	NA	159	33	20	2
1007702572	Z	A	2	36	1	77	165	28	2023	2	1	1	1	3	0	2	2	2	2	NA	NA	NA	NA	NA	NA	NA	NA	NA	NA	92	95	8	2
2100009615	T	A	2	64	2	51	170	17.6	2023	2	1	2	1	1	0	2	2	2	1	NA	NA	NA	NA	NA	NA	NA	NA	NA	NA	90	62	9	2
2100046196	S	H	2	41	2	71	150	31.6	2023	2	1	2	1	3	0	2	2	1	2	NA	NA	NA	NA	NA	NA	NA	NA	NA	NA	72	93	14	3
2100119461	S	A	2	33	1	50	168	18	2023	3	3	1	1	3	0	2	2	1	1	NA	NA	NA	NA	NA	NA	NA	NA	NA	NA	96	92	30	4
2100145380	M	A	2	33	2	81	170	28	2023	2	3	1	1	1	0	2	2	2	1	NA	NA	NA	NA	NA	NA	NA	NA	NA	NA	72	98	14	5
2100156886	S	A	2	63	1	54	162	21	2023	2	1	1	1	2	1	2	2	2	1	NA	NA	NA	NA	NA	NA	NA	NA	NA	NA	96	57	28	6
2100336554	H	A	2	21	1	41	168	15	2023	2	1	1	1	2	0	2	2	2	1	NA	NA	NA	NA	NA	NA	NA	NA	NA	NA	139	64	23	22
2100351297	H	M	2	53	1	78	170	27	2021	2	1	2	1	2	0	2	2	2	1	NA	NA	NA	NA	NA	NA	NA	NA	NA	NA	101	77	8	1
2100354047	F	N	2	63	2	71	160	28	2023	3	1	1	1	1	0	2	2	2	2	NA	NA	NA	NA	NA	NA	NA	NA	NA	NA	129	40	9	2
2100378873	M	A	2	43	2	0	0	0	2005	3	1	3	2	NA	0	2	2	2	2	NA	NA	NA	NA	NA	NA	NA	NA	NA	NA	239	22	15	2
